# Supplementary material for: Direct impact of commonly used dietary emulsifiers on human gut microbiota
Source: PubMed Central journal article supplement (PMC7986288; doi:10.1186/s40168-020-00996-6), 2021-03-22
Supplement: 40168_2020_996_MOESM2_ESM.pdf [file 40168_2020_996_MOESM2_ESM.pdf]

A

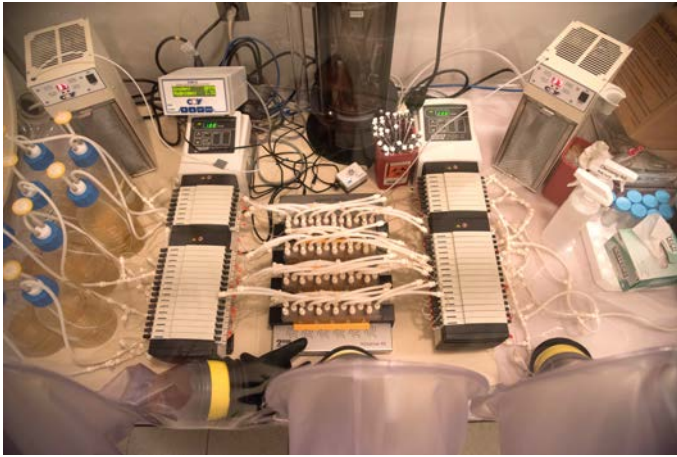

B

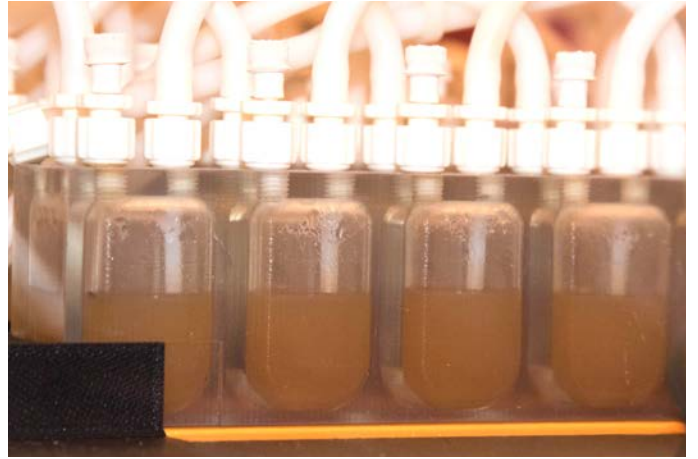

C

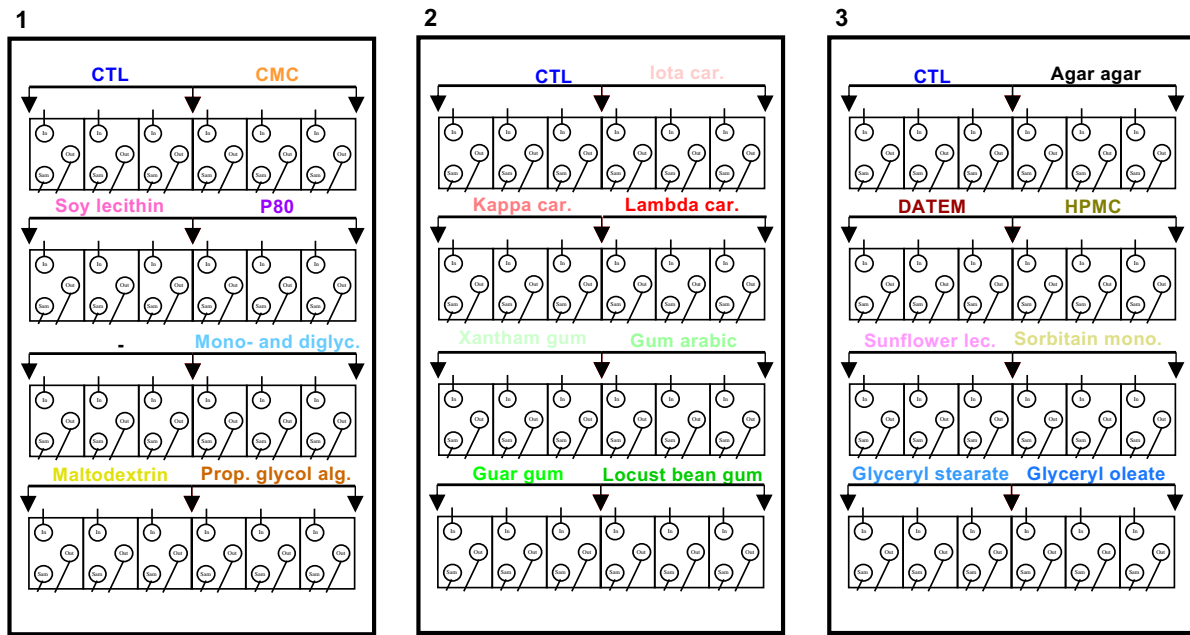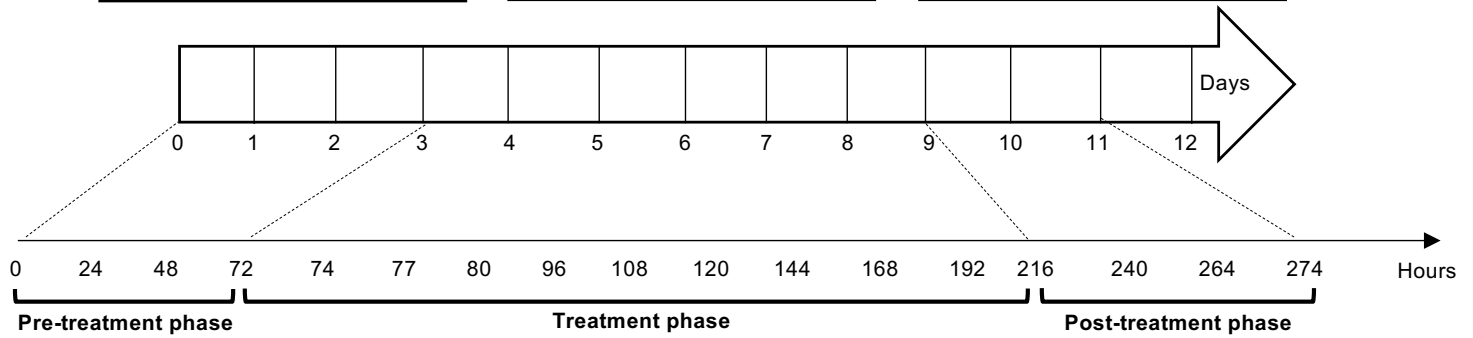

D

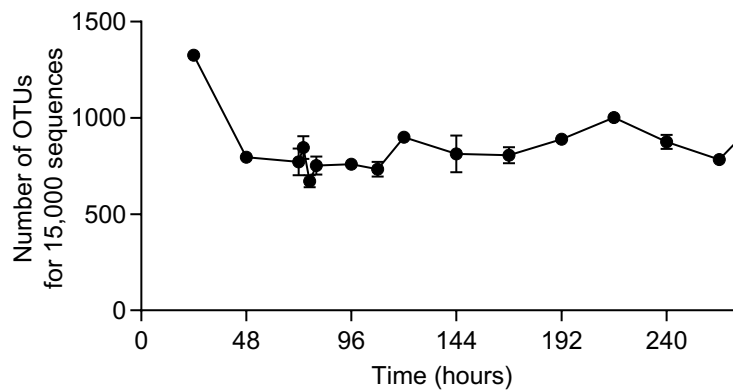

Figure S1.

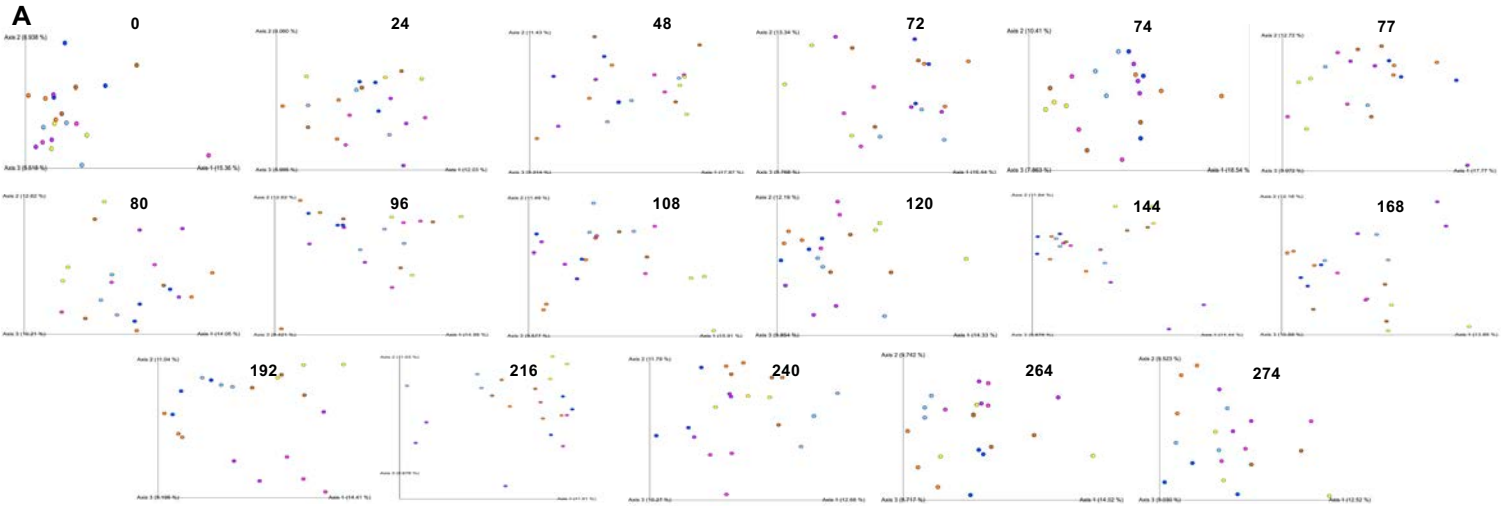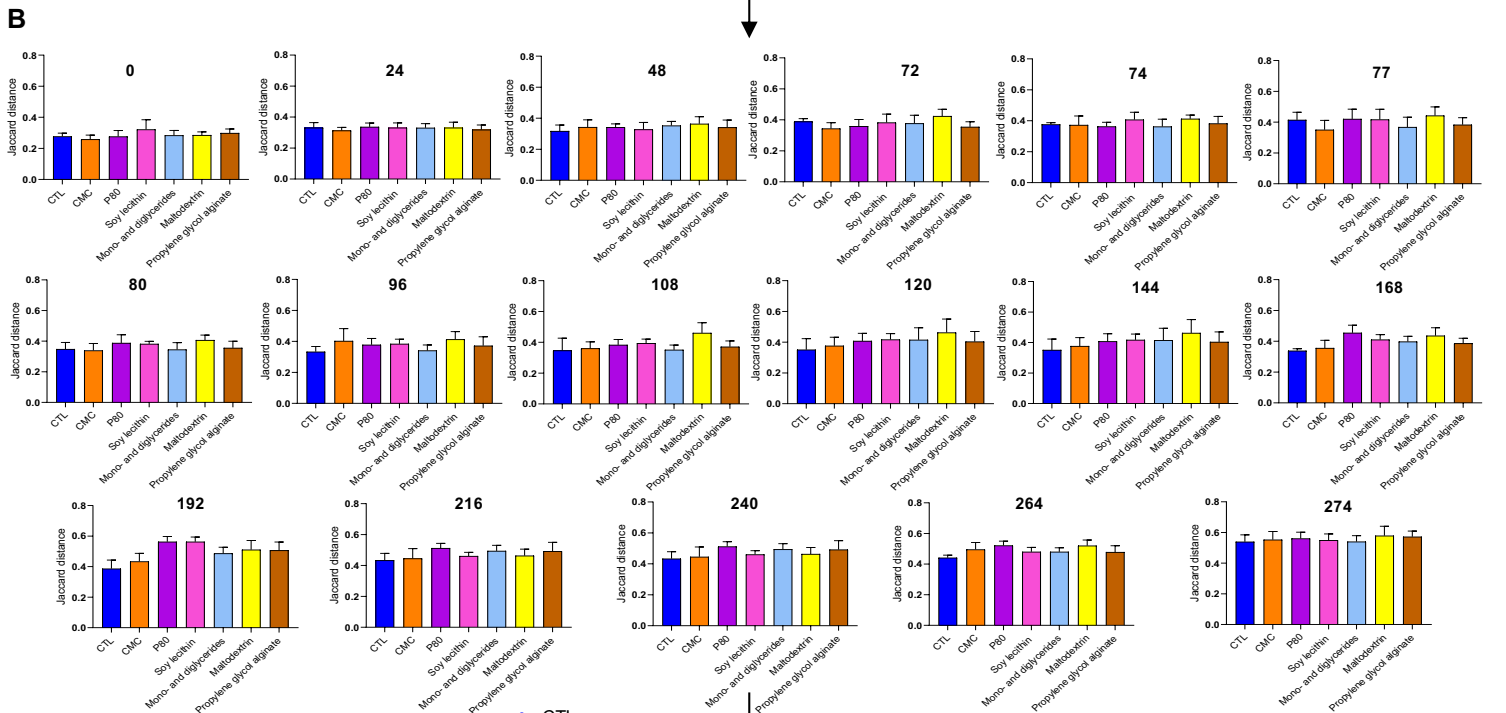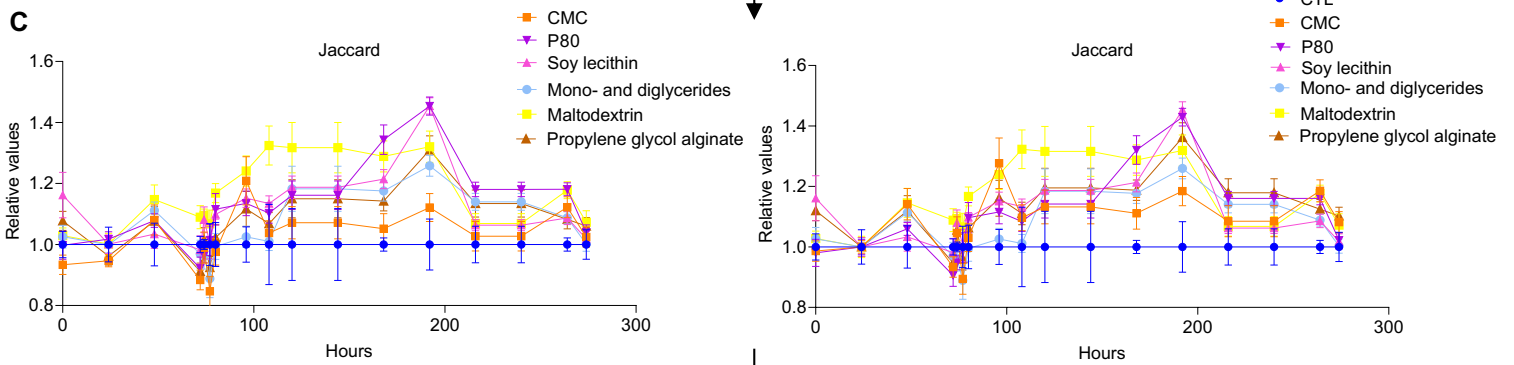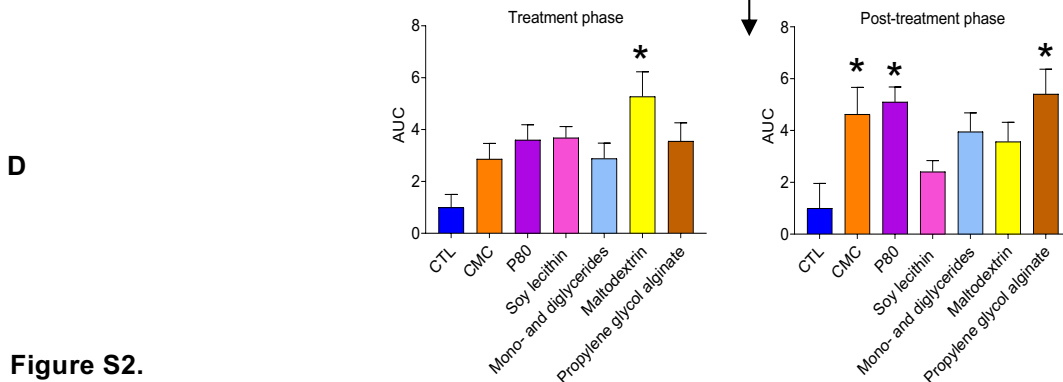

Figure S2.

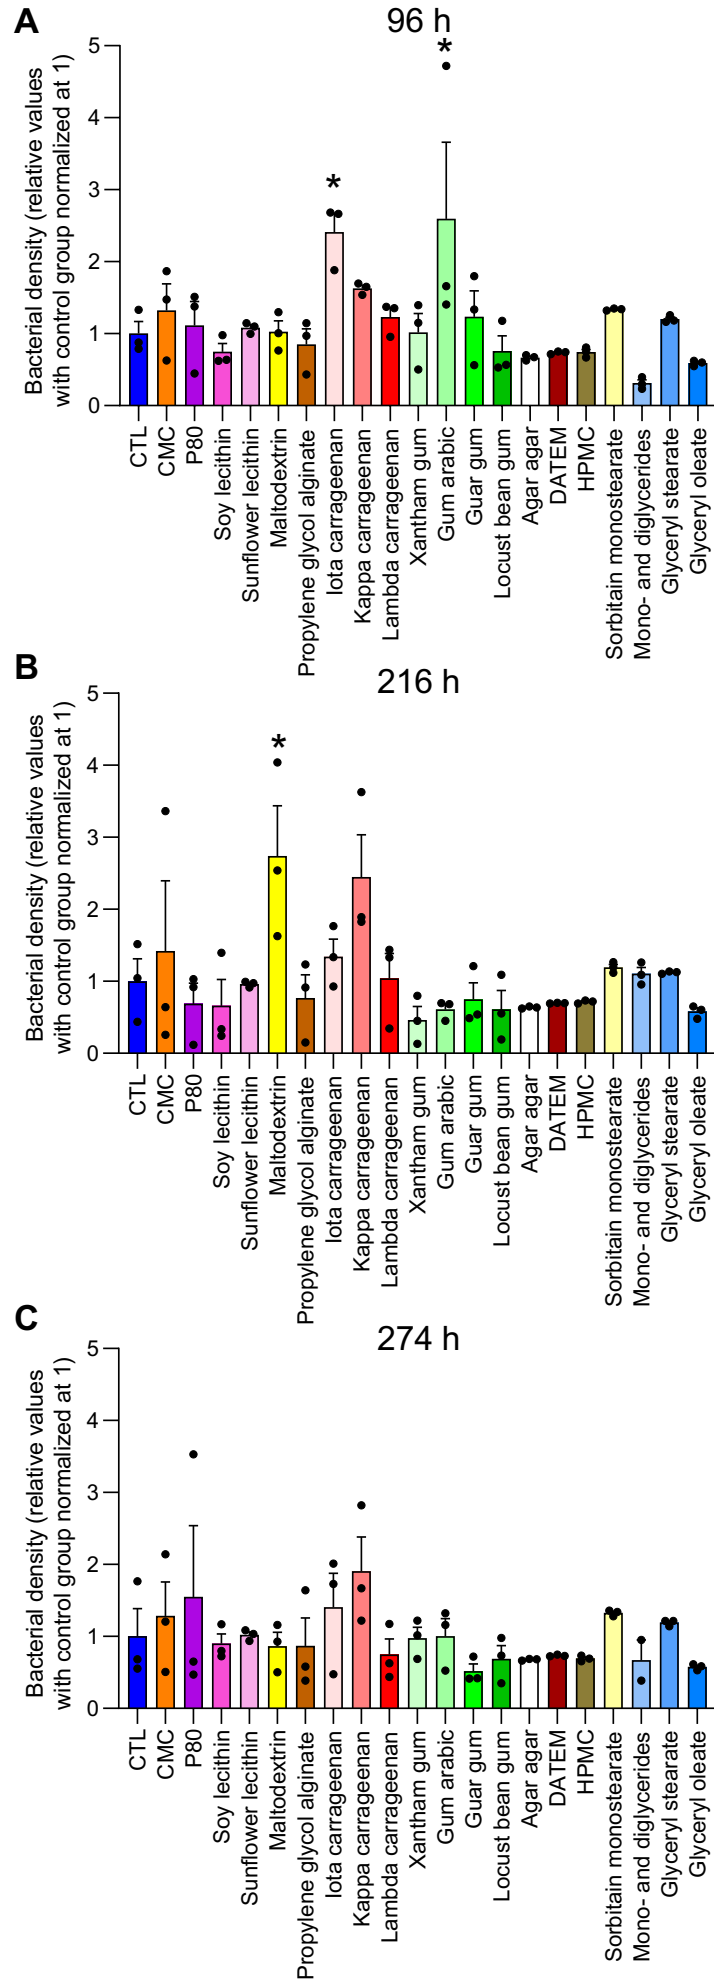

Figure S3.

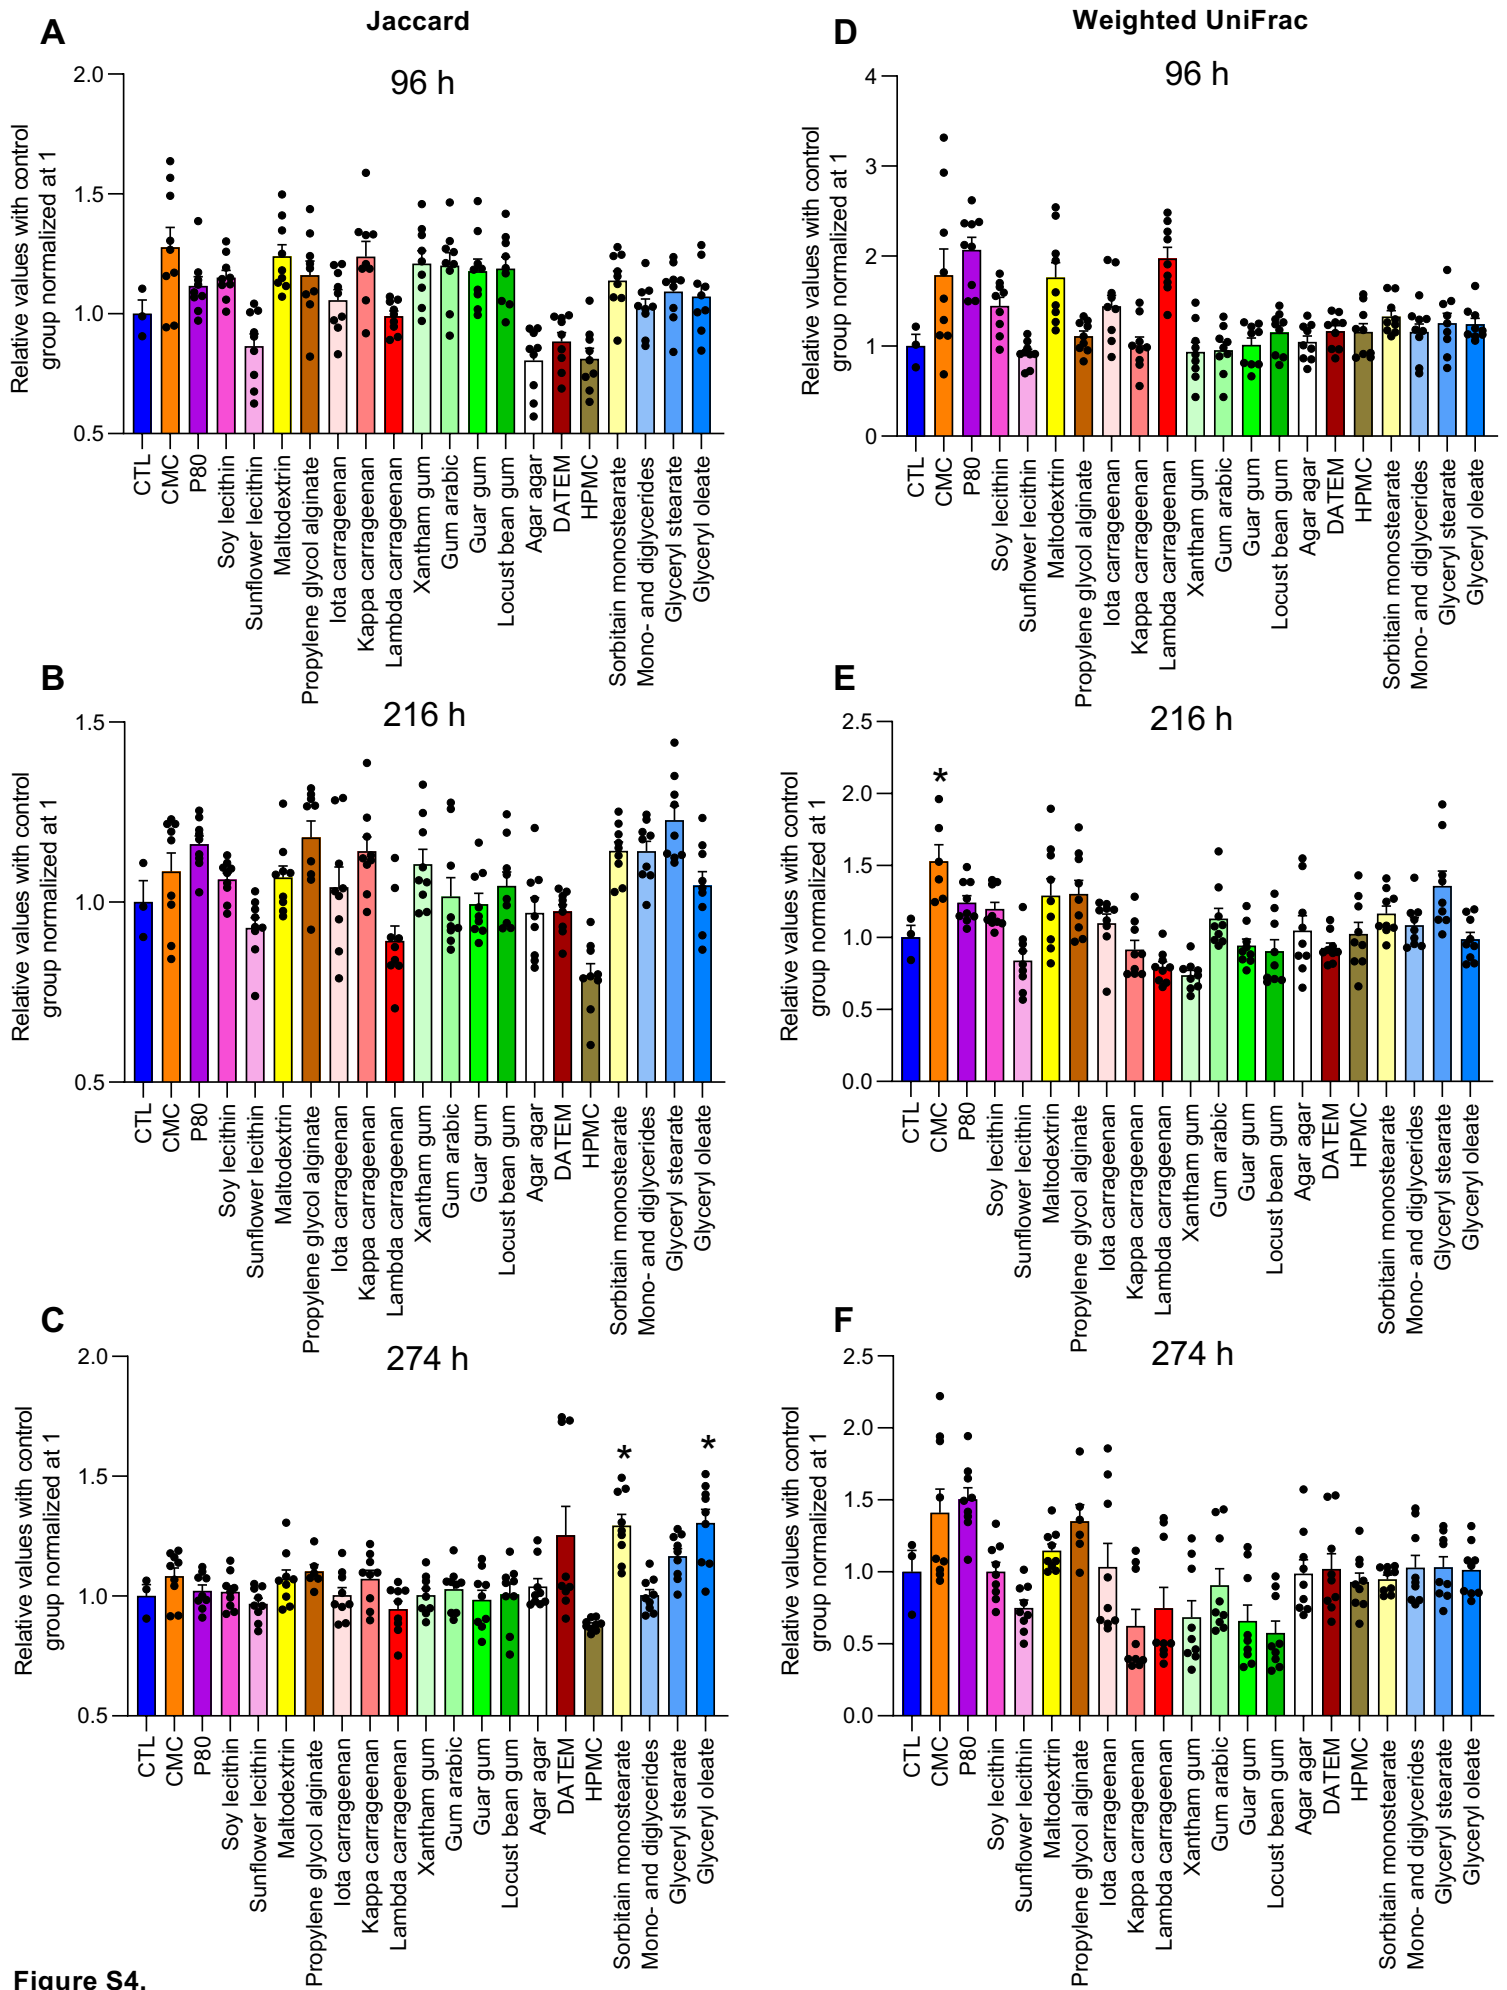

Figure S4.

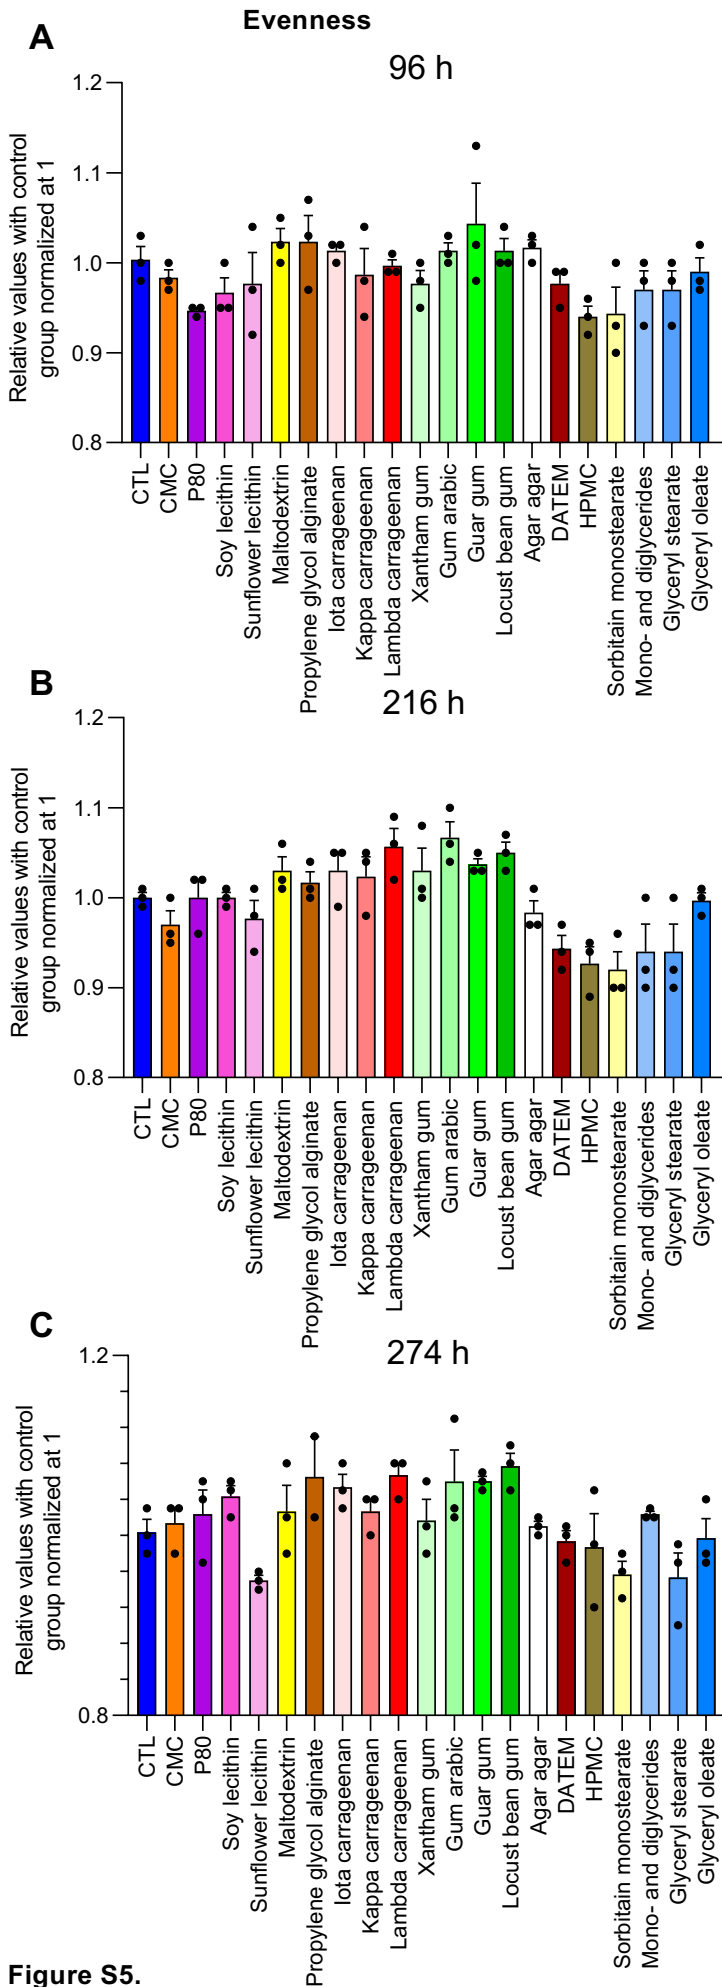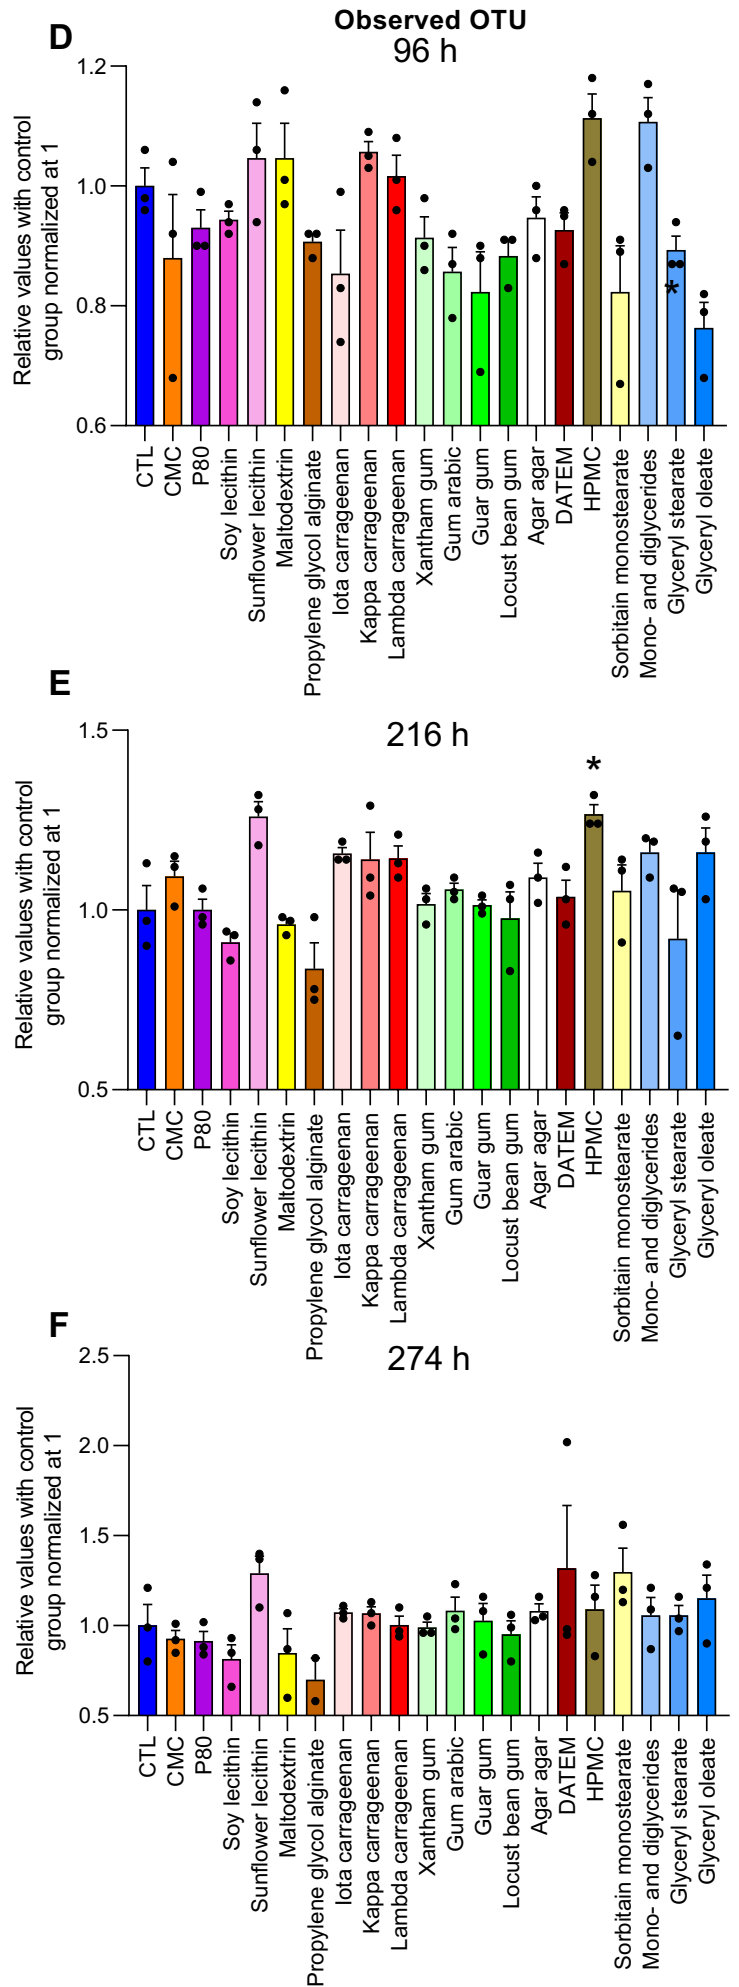

Figure S5.

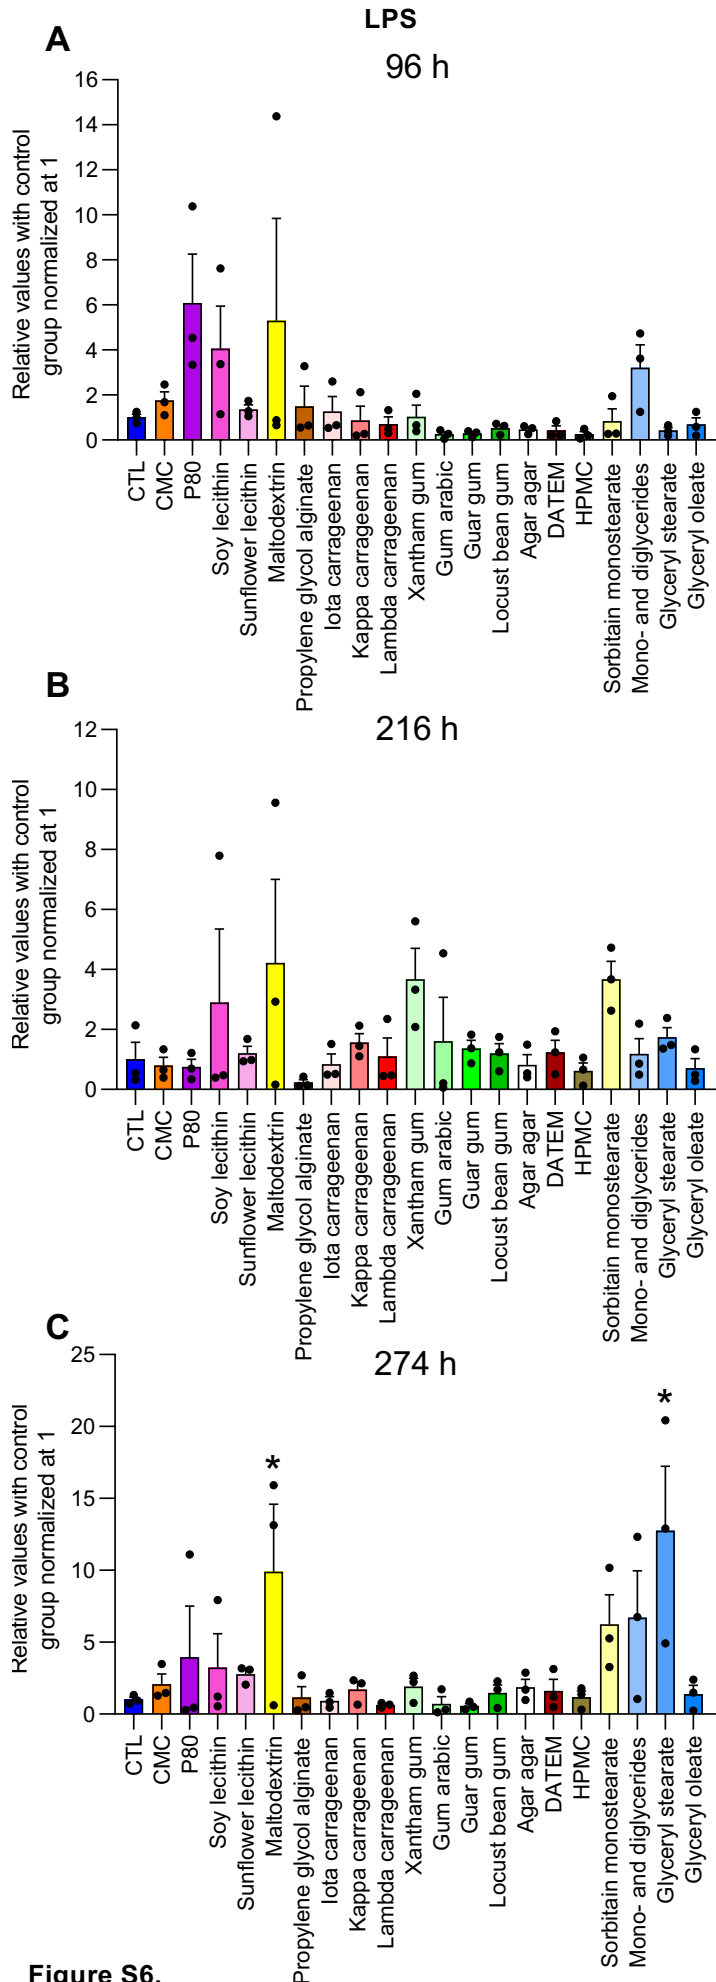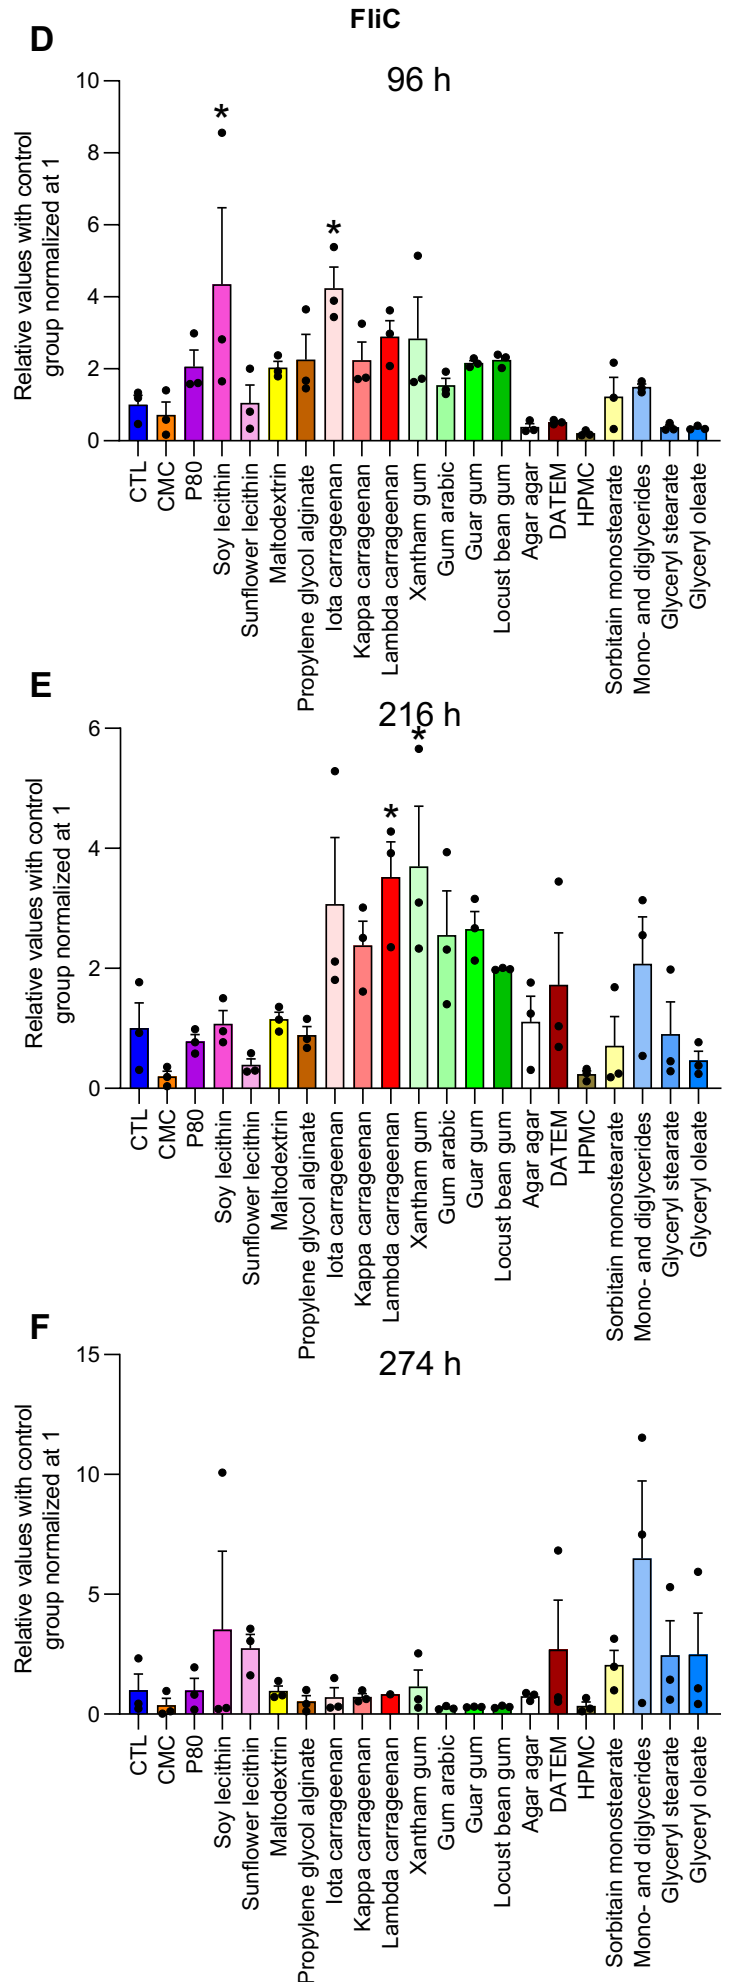

**Figure S6.**

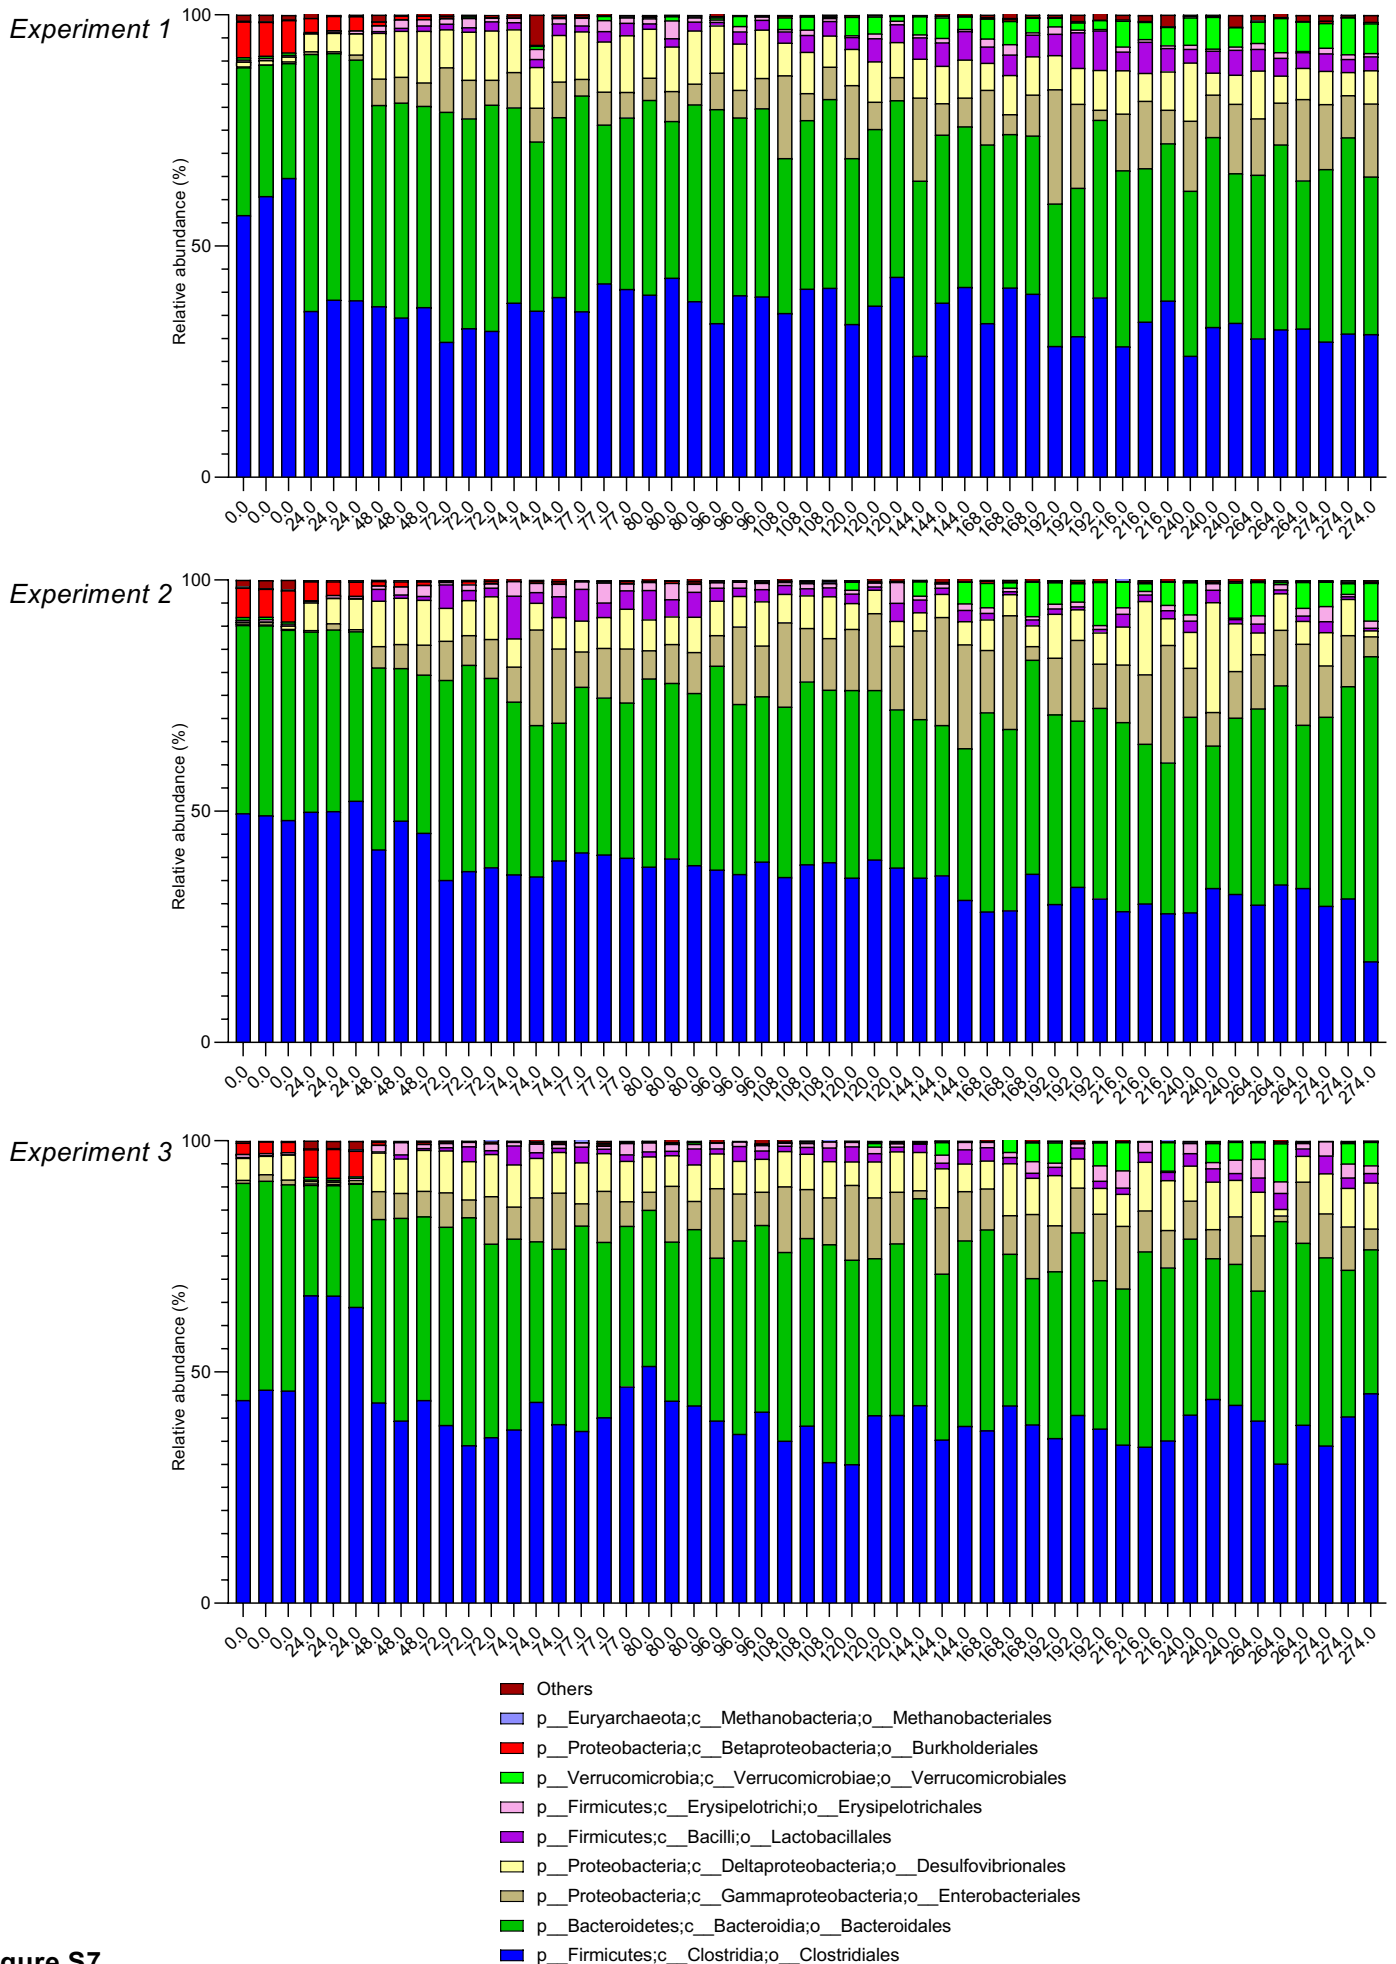

Figure S7.

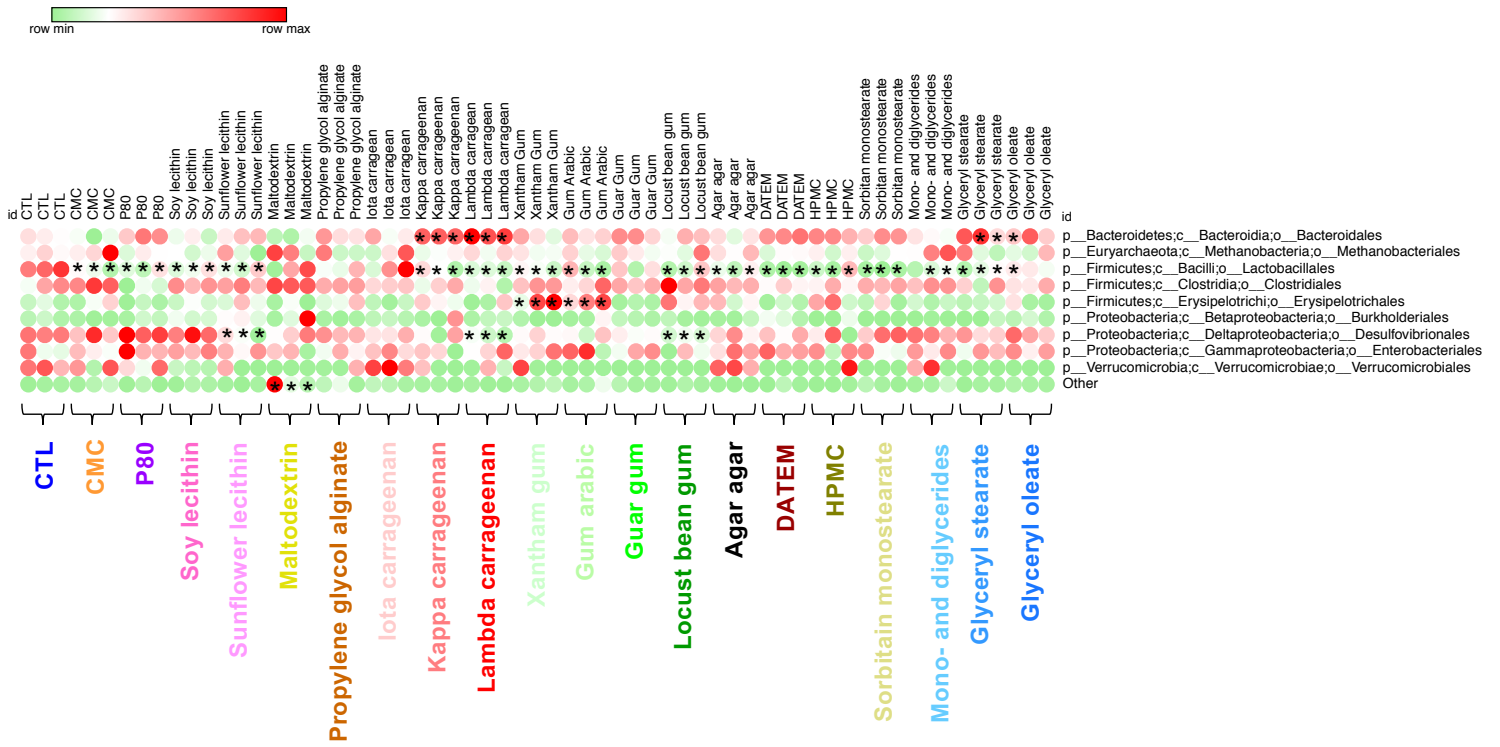

Figure S8.



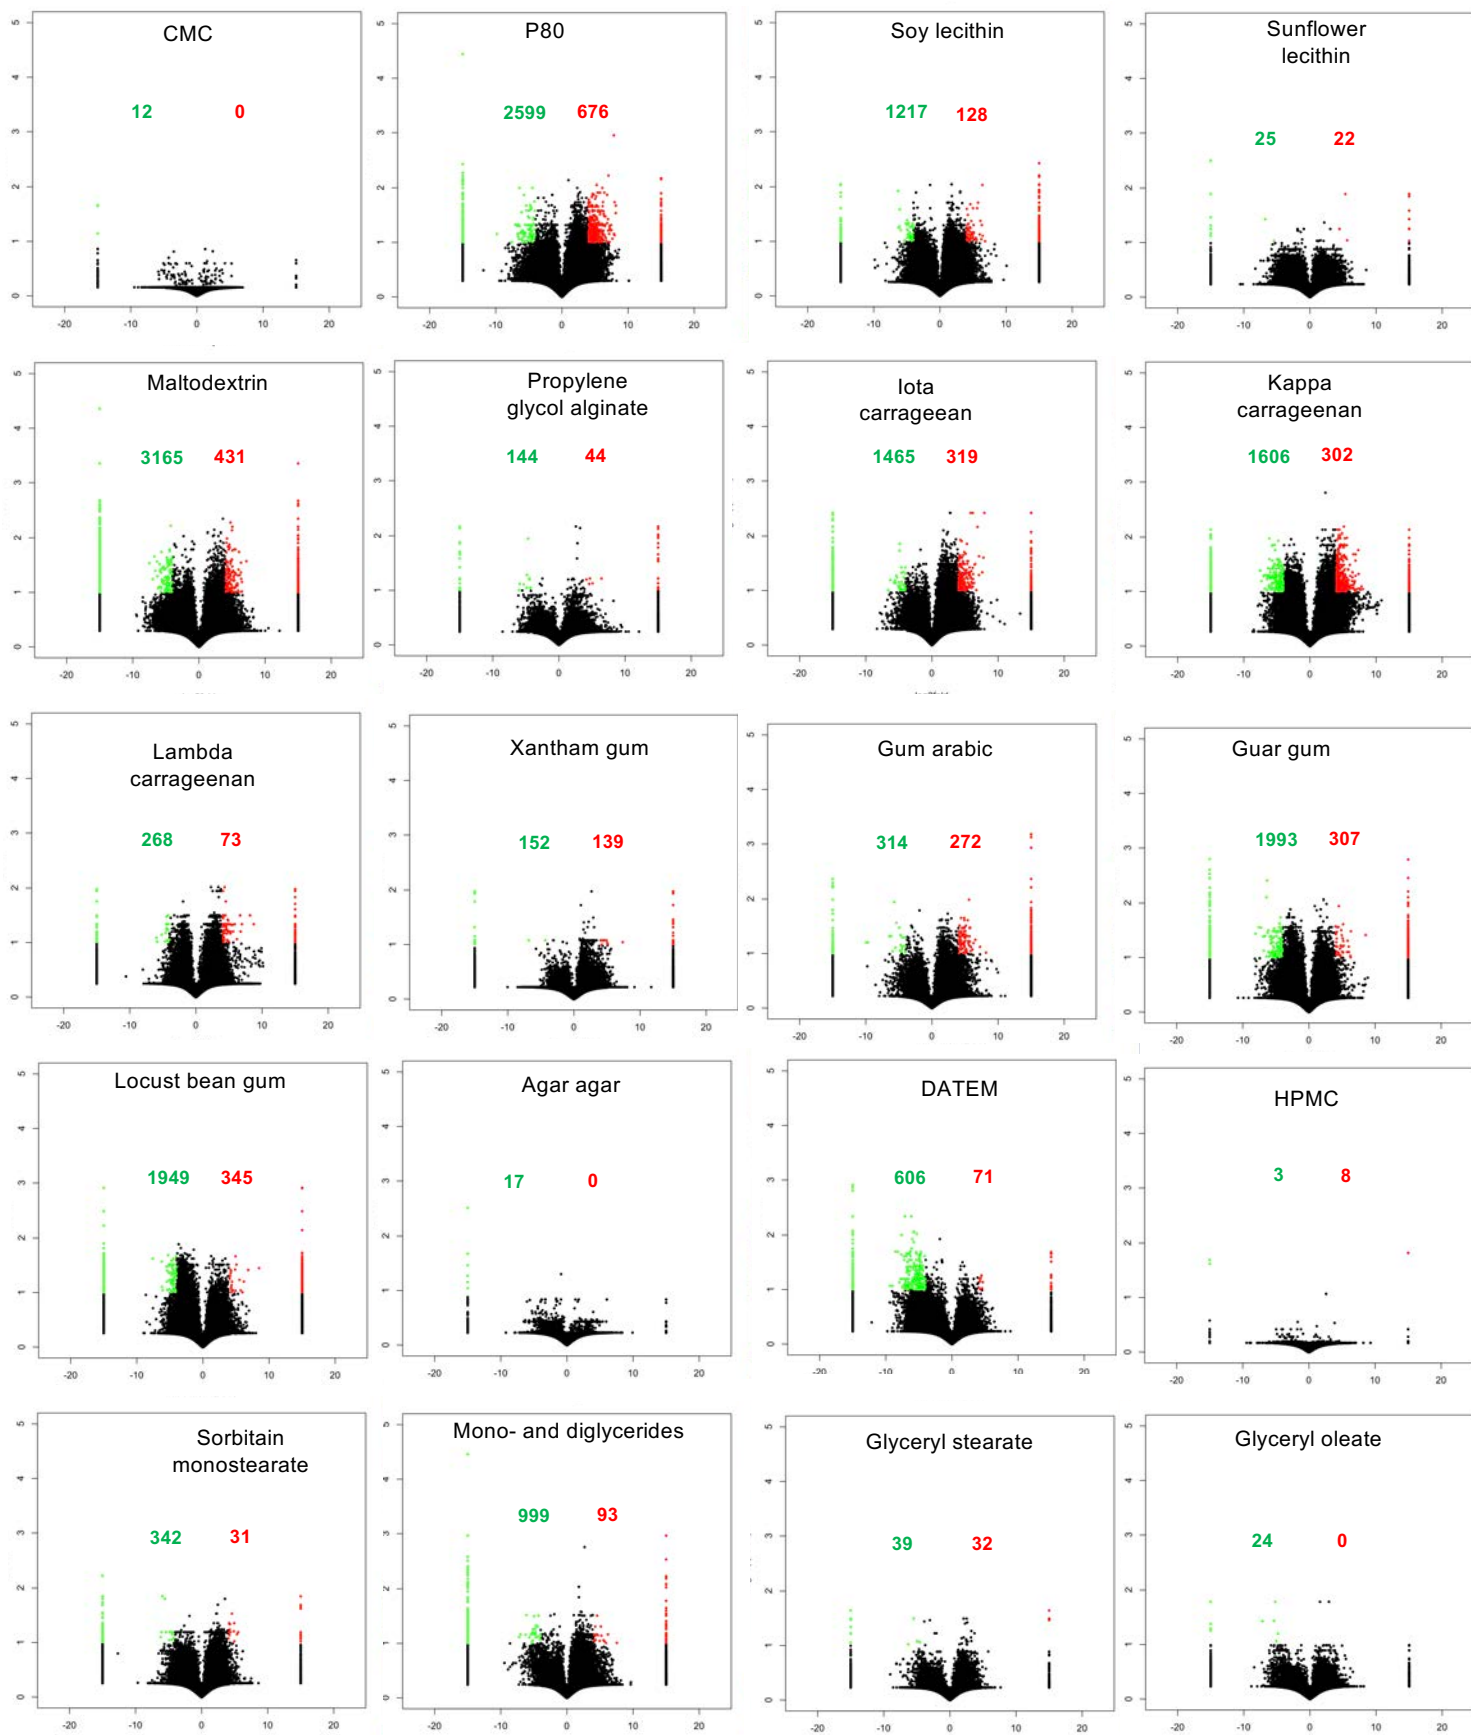

Figure S9.

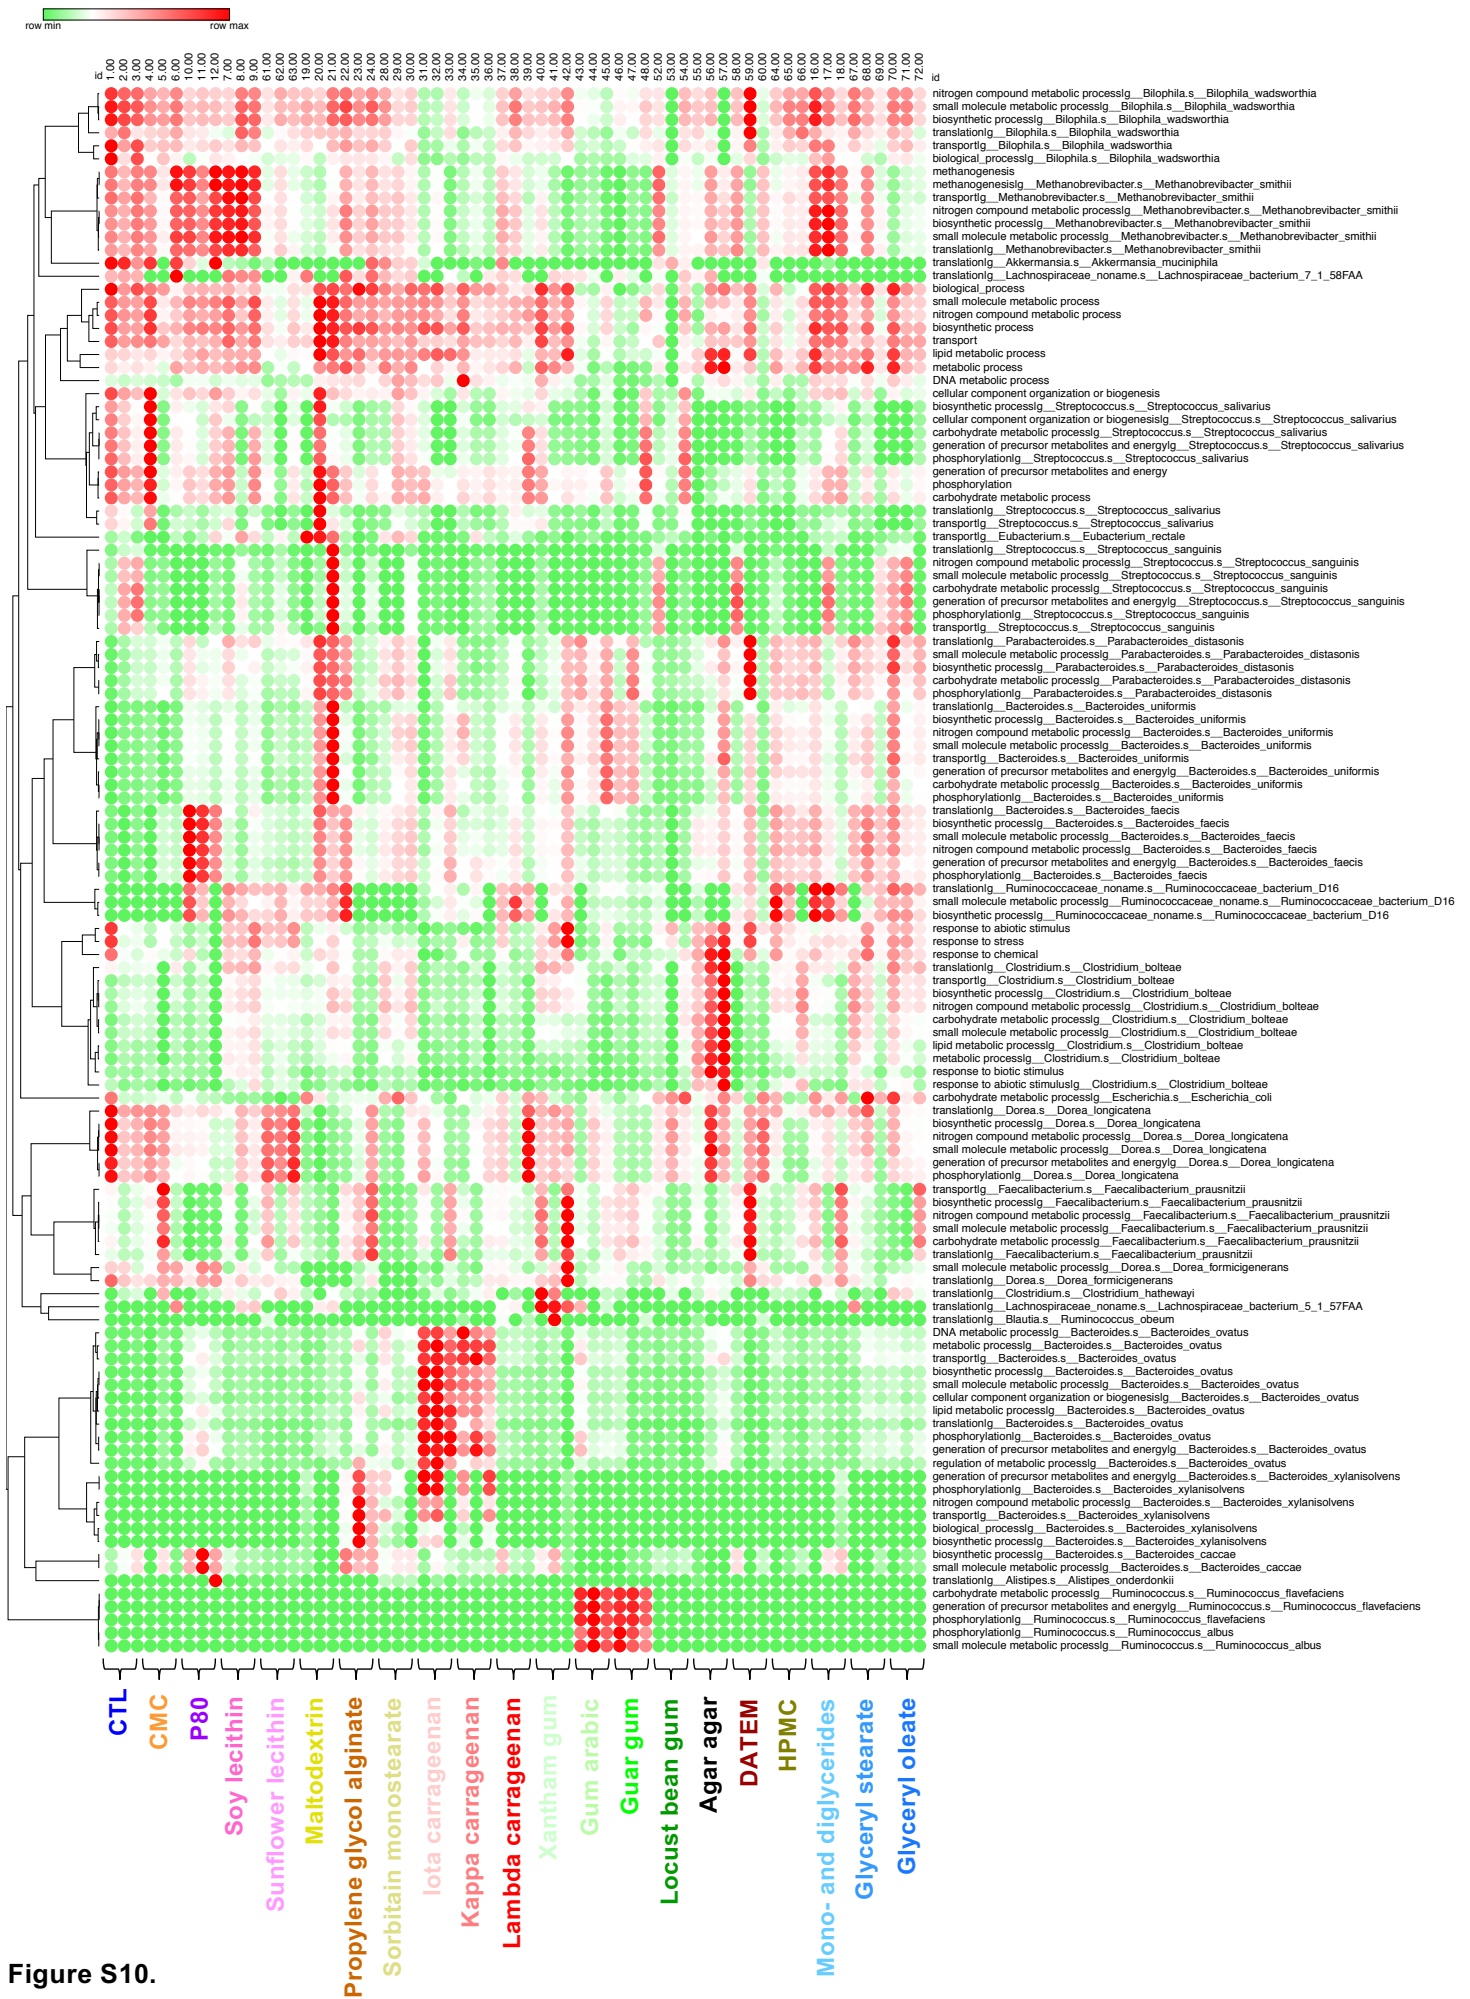

Figure S10.

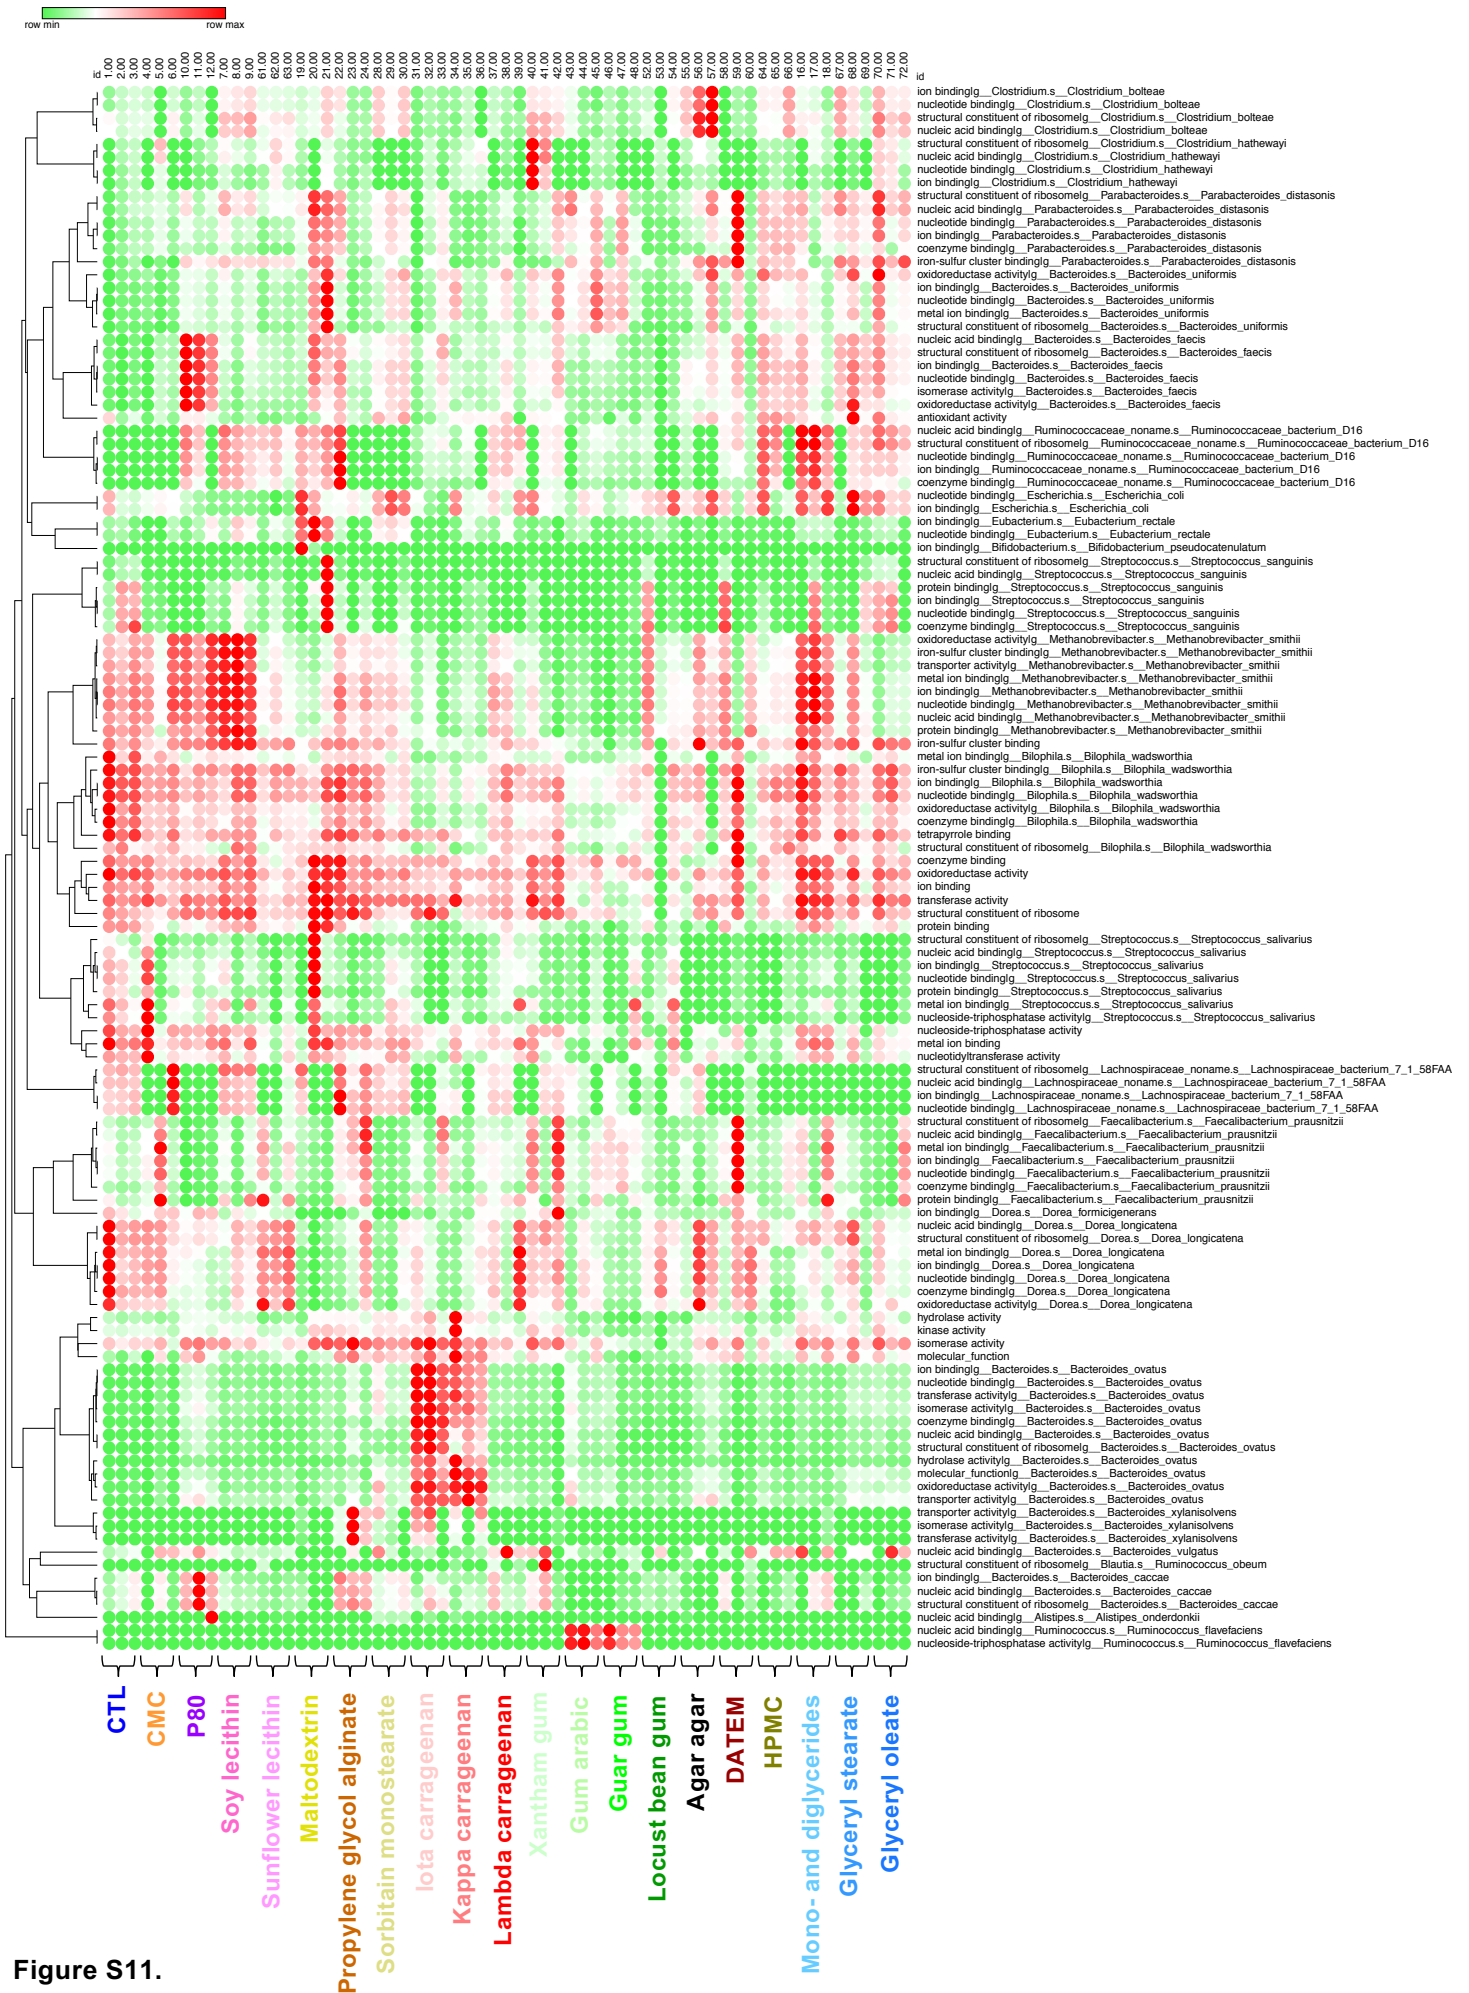

Figure S11.
